# Supplementary material for: Critical uncoupling between biogeochemical stocks and rates in Ross Sea springtime production-export dynamics
Source: Copernicus journal article supplement (doi:10.5194/egusphere-2024-3830), 2024-12-19
Supplement: Supplementary file 1 [file egusphere-2024-3830-supplement.pdf]

# **Critical uncoupling between biogeochemical stocks and rates in Ross Sea springtime production-export dynamics**

Meredith G. Meyer<sup>1,3</sup>, Esther Portela<sup>1,2</sup>, Walker O. Smith Jr.<sup>3,4</sup>, Karen J. Heywood<sup>1</sup>

<sup>1</sup>Centre for Ocean and Atmospheric Sciences, School of Environmental Sciences, University of East Anglia, Norwich, UK

<sup>2</sup>Laboratoire d'Océanographie Physique et Spatiale, University of Brest, CNRS, IRD, Ifremer, Plouzané, France

<sup>3</sup>Virginia Institute of Marine Science, William & Mary, Gloucester Pt., VA, USA

<sup>4</sup>School of Oceanography, Shanghai Jiao Tong University, Shanghai, China

Supplemental Material

*Correspondence to:* Meredith Meyer (m.meyer@uea.ac.uk)

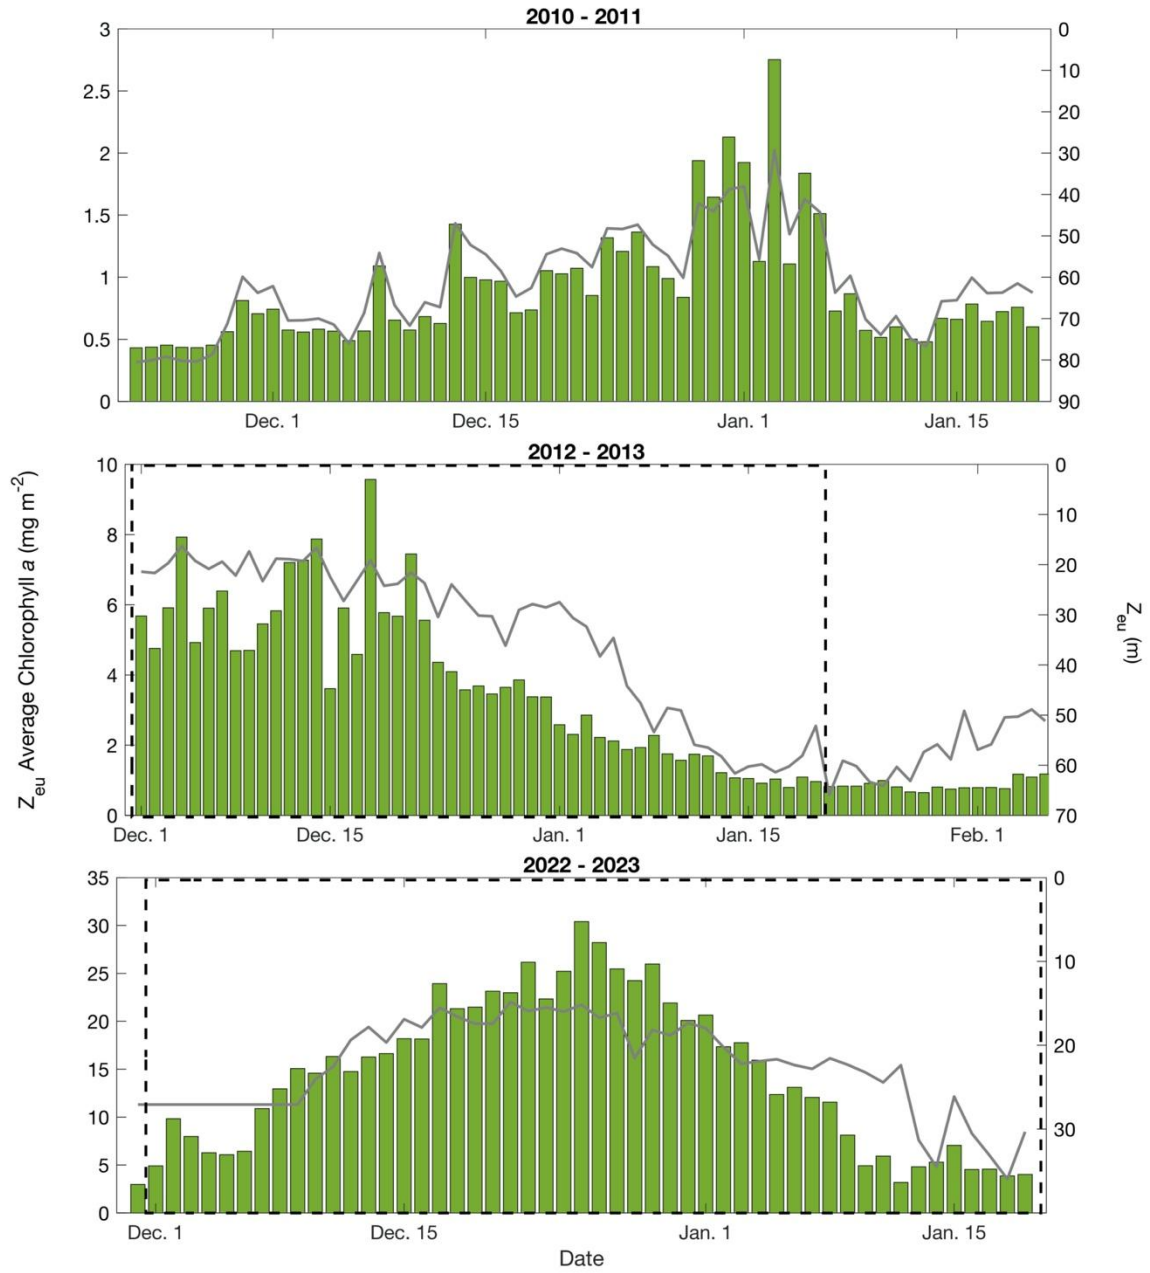

**Figure S1.** Average euphotic zone ( $Z_{eu}$ ) chlorophyll  $a$  concentrations ( $\text{mg m}^{-2}$ ; left y-axis) by day and the average daily euphotic zone (m; right y-axis) for 2010-2011, 2012-2013, and 2022-2023 glider deployments. The dashed box represents sample days where chlorophyll concentrations are within 90% of the peak chlorophyll concentrations. Absence of a box indicates all samples are located within 90%. In 2022-2023,  $Z_{eu}$  values were extrapolated from December 9<sup>th</sup> backwards to account for absent PAR data.

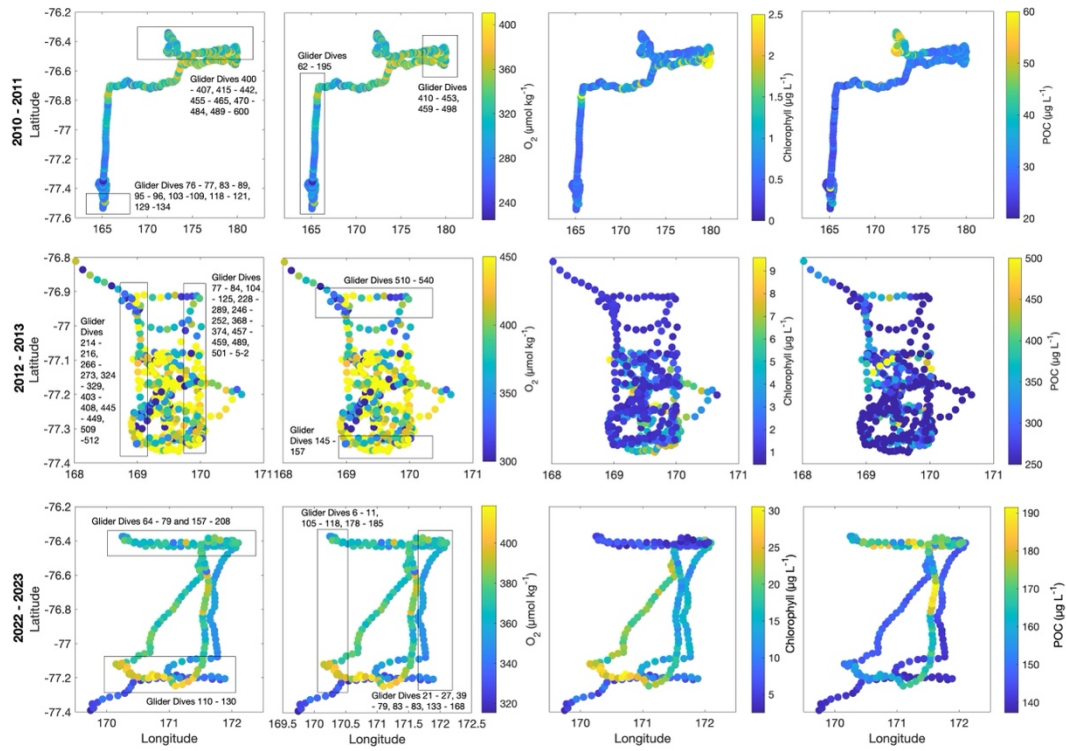

**Figure S2.** Average 25 m dissolved oxygen ( $\mu\text{mol kg}^{-1}$ ), chlorophyll ( $\mu\text{g L}^{-1}$ ), and particulate organic carbon (POC;  $\mu\text{g L}^{-1}$ ) concentrations by latitude and longitude for the 2010-2011, 2012-2013, and 2022-2023 glider deployments. The boxes indicate minimal and maximal latitude and longitude glider dives used to calculate advective fluxes of oxygen and POC.

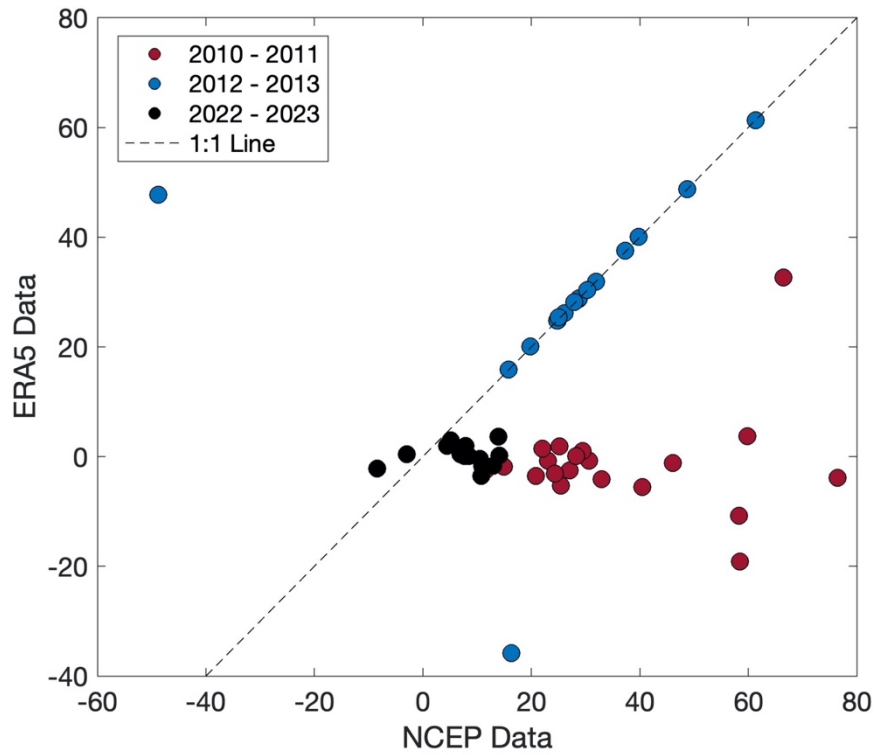

**Figure S3.** Air sea exchange rates that utilize National Center for Environmental Prediction (NCEP) Reanalysis 1 wind speed and sea level pressure data versus air sea exchange rates that utilize ECMWF Reanalysis v5 (ERA5) wind speed and sea level pressure data for the 2010-2011, 2012-2013, and 2022-2023 deployment dates, specifically. The dashed line represents a 1:1 line. Ultimately, NCEP reanalysis products were deemed best fitted to the study.

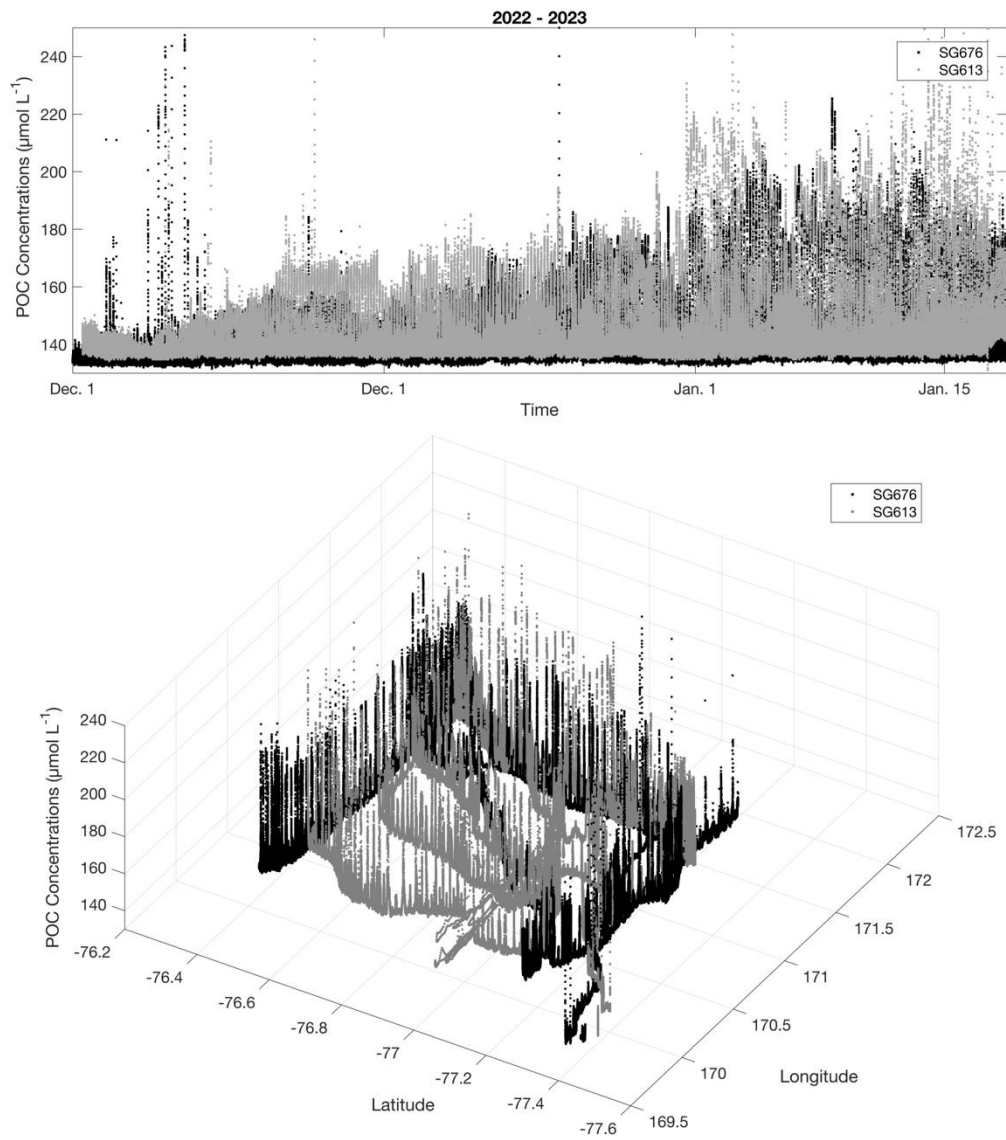

**Figure S4.** Temporal and spatial comparison of discrete POC concentrations ( $\mu\text{mol C L}^{-1}$ ) from Seagliders 676 and 613 deployed in the Ross Sea in 2022-2023. Glider measurements show minimal temporal variability despite being in different locations.

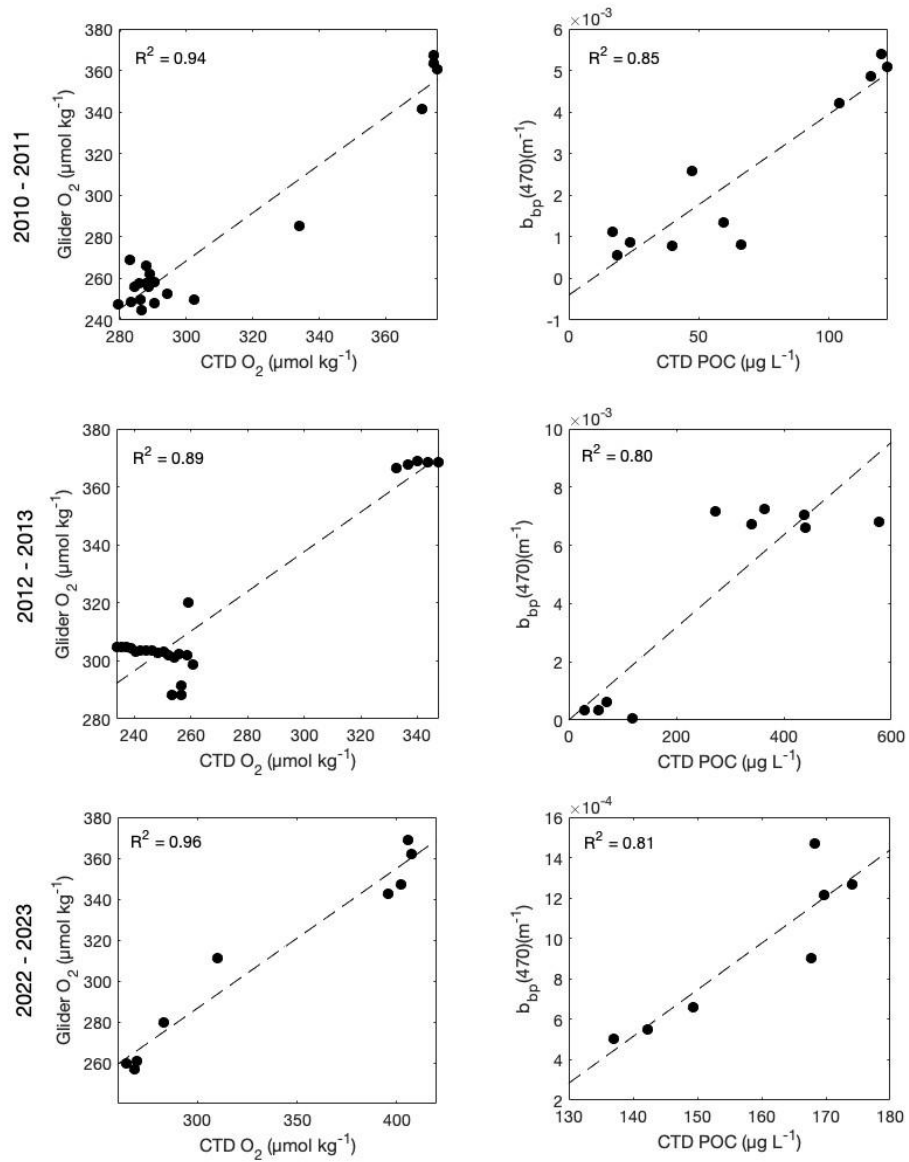

**Figure S5.** CTD vs. glider derived oxygen ( $\mu\text{mol O}_2 \text{ kg}^{-1}$ ) and POC concentrations ( $\mu\text{g C L}^{-1}$ ) for 2010-2011, 2012-2013, and 2022-2023 glider deployments. CTD and glider oxygen concentrations come from an Aandera optode. Glider POC concentrations come from a Wetlabs sensor whereas CTD POC concentrations come from water samples collected from the CTD rosette, filtered, and analysed according to Gardner et al. (2000).

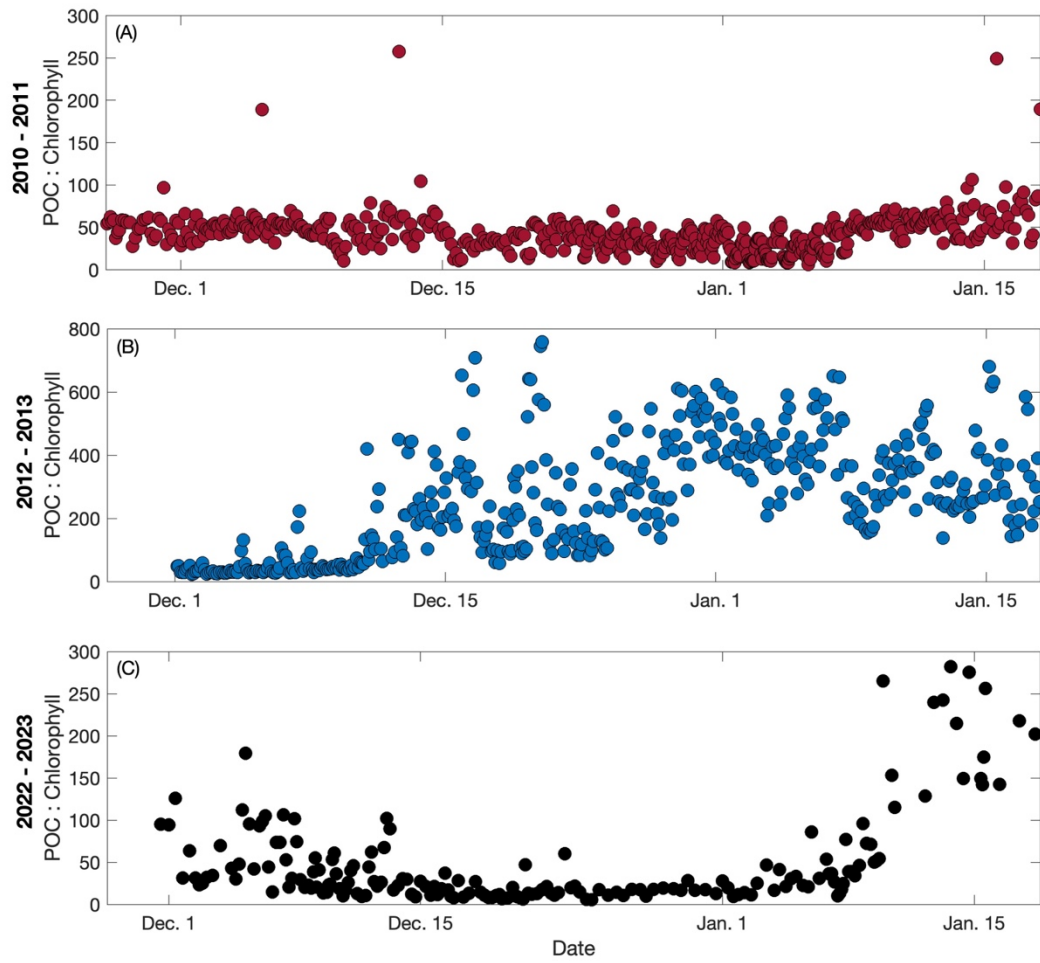

**Figure S6.** Average 5 m particulate organic carbon: chlorophyll (POC:Chl) ratios through time for each of the glider deployments.
